# Supplementary material for: Folded alkyl chains in water-soluble capsules and cavitands
Source: Royal Society of Chemistry journal article supplement (doi:10.1039/c4ob01032a), 2014-01-01
Supplement: c4ob01032a1.pdf [file c4ob01032a1.pdf]

Supporting Information for:

## Folded alkyl chains in water-soluble capsules and cavitands

Jesse V. Gavette,<sup>b</sup> Kang-Da Zhang,<sup>b</sup> Dariush Ajami,<sup>b</sup> and Julius Rebek, Jr.<sup>a,b\*</sup>

<sup>a</sup> Department of Chemistry, Fudan University, 220 Handan Road, Shanghai, 200433 China.

<sup>b</sup> Skaggs Institute for Chemical Biology, The Scripps Research Institute, and Department of Chemistry, 10550 North Torrey Pines Road, La Jolla, CA 92037; E-mail: jrebek@scripps.edu; Fax: 858-784-2876; Tel: 541-346-1695.

### Table of Contents

|                                                      |    |
|------------------------------------------------------|----|
| 1. Experimental Procedures                           | 2  |
| 2. Alkane Competition Experiments                    | 3  |
| 3. 2-D NMR of <b>1a</b> with 11-Aminoundecanoic Acid | 5  |
| 4. Cartesian Coordinates of Calculated Structures    | 6  |
| 5. References                                        | 15 |

## Experimental Procedures

**General.** All guests were obtained from TCI-America, Sigma-Aldrich, or Acros and used as received.  $^1\text{H}$  and spectra were recorded using either a Bruker AV 600 or Bruker DRX 600 ( $^1\text{H}$ : 600.0 MHz) spectrometer at 298 K. Chemical shifts ( $\delta$ ) are reported in ppm shifted from tetramethylsilane ( $\delta_{\text{H}}$  0.00) and referenced to residual non-deuterated solvent HDO ( $\text{D}_2\text{O}$ :  $\delta_{\text{H}}$  4.79 ppm).<sup>1</sup> All NMR spectra were processed using MestReNova NMR processing software.

**NMR Titrations.** Solutions of **1a** were prepared to a final concentration ranging from 0.0080-0.0010 M. In each case, 400  $\mu\text{L}$  of this solution was transferred to an NMR tube. Water insoluble guests including *n*-alkanes and 11-aminoundecanoic acid were added in excess, in neat 2  $\mu\text{L}$  portions for liquids and as a spatula tip full for solids. The diol-based guests were dissolved in  $\text{D}_2\text{O}$  with concentrations ranging from 0.013-0.042 M, and were added to achieve a 1:1 host/guest molar ratio in the NMR tube. In all cases the NMR tubes containing the host/guest mixtures were sonicated for  $\geq 3$  h.

## Alkane Competition Experiments

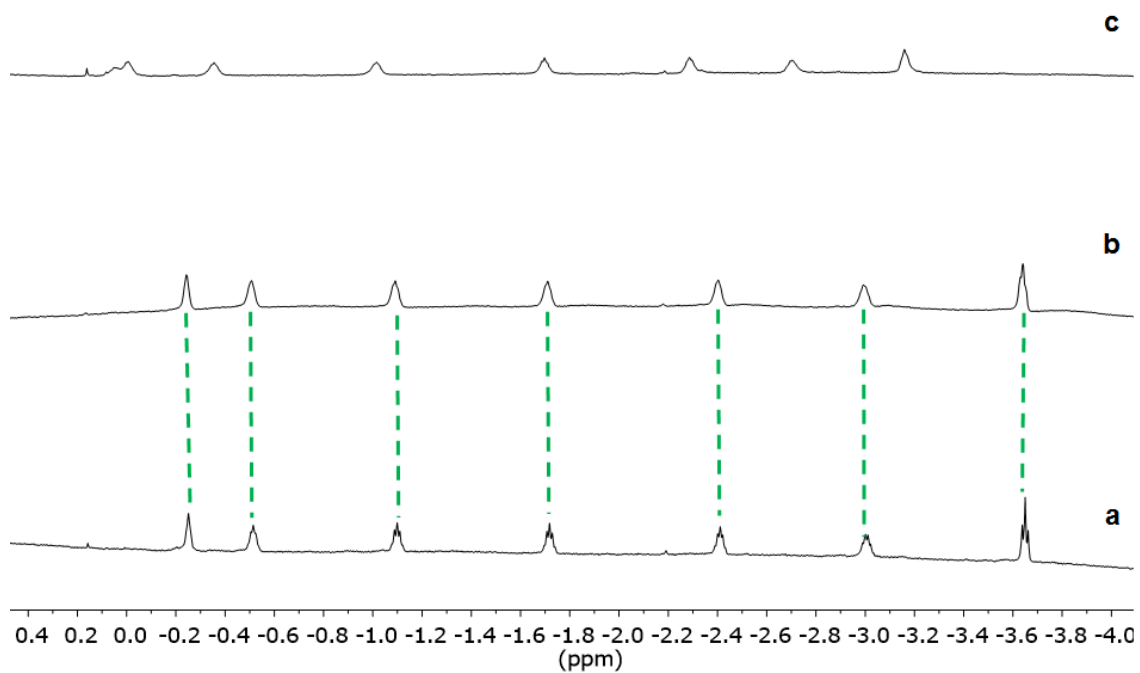

**Fig. S1** Partial  $^1\text{H}$  NMR (D<sub>2</sub>O, 600 MHz) spectra of the upfield shifted resonances of **1.1** in the presence of a) *n*-tetradecane and *n*-pentadecane, b) *n*-tetradecane only and c) *n*-pentadecane only showing encapsulated guest(s).

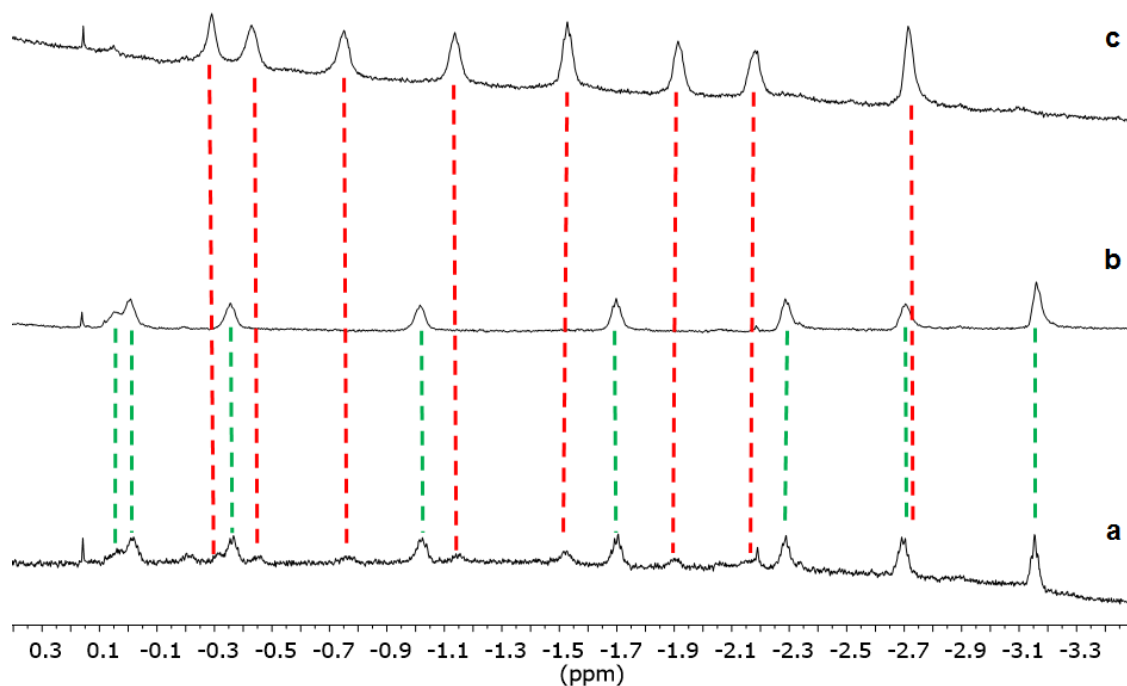

**Fig. S2** Partial  $^1\text{H}$  NMR spectra (D<sub>2</sub>O, 600 MHz) of the upfield shifted resonances of **1.1** in the presence of a) *n*-pentadecane and *n*-hexadecane, b) *n*-pentadecane only and c) *n*-hexadecane only showing encapsulated guest(s).

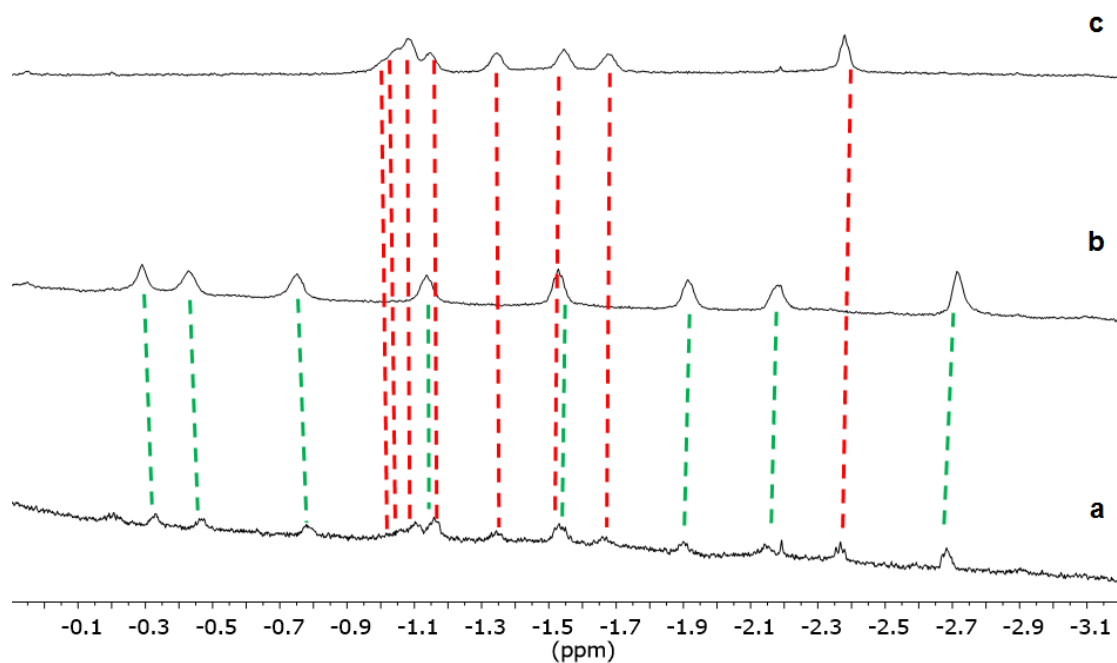

**Fig. S3** Partial  $^1\text{H}$  NMR ( $\text{D}_2\text{O}$ , 600 MHz) spectra of the upfield shifted resonances of **1.1** in the presence of a) *n*-hexadecane and *n*-heptadecane, b) *n*-hexadecane only and c) *n*-heptadecane only showing encapsulated guest(s).

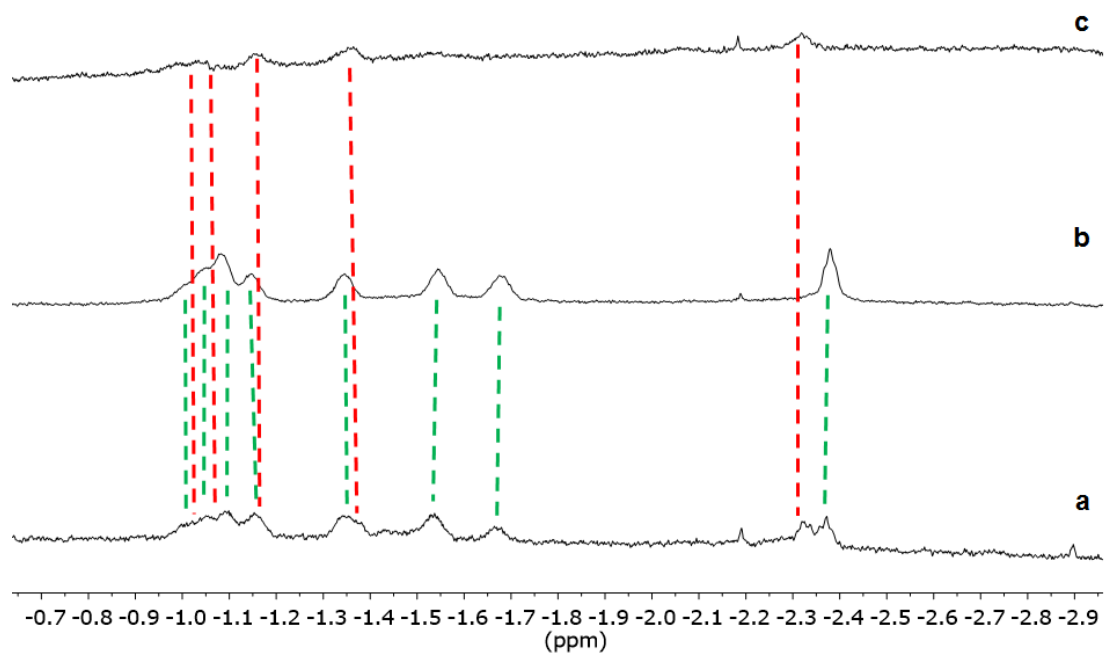

**Fig. S4** Partial  $^1\text{H}$  NMR ( $\text{D}_2\text{O}$ , 600 MHz) spectra of the upfield shifted resonances of **1.1** in the presence of a) *n*-heptadecane and *n*-octadecane, b) *n*-heptadecane only and c) *n*-octadecane only showing encapsulated guest(s).

## 2-D NMR of 1a with 11-Aminoundecanoic Acid

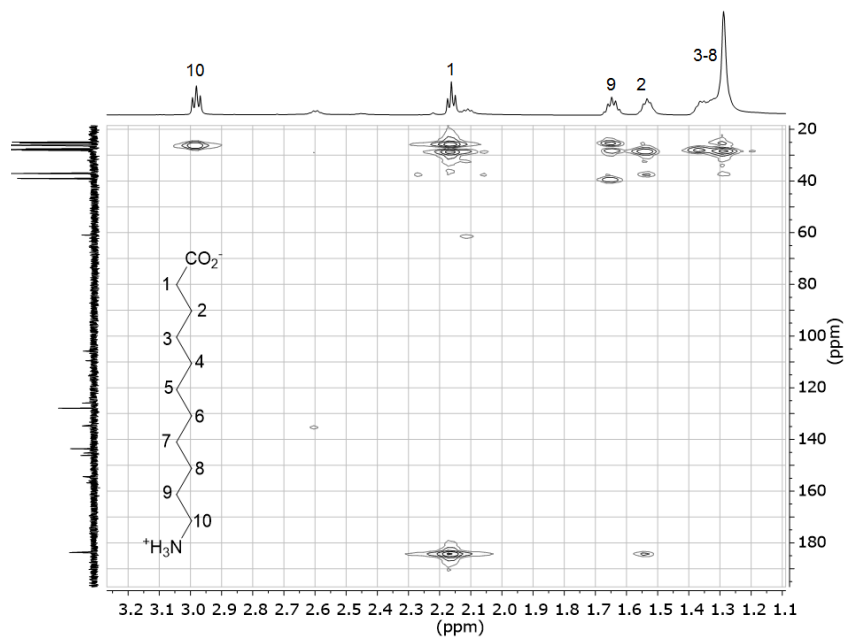

**Fig. S5** Partial  $^1\text{H}$ - $^{13}\text{C}$  HMBC spectra ( $\text{D}_2\text{O}$ ) of **1a** with 11-aminoundecanoic acid highlighting that the methylene alpha to the ammonium in the “free” guest is the furthest downfield. This resonance is anticipated to be the furthest downfield for the “bound” species as well, and this assumption was made for the assignment of the “bound” signals in subsequent 2-D NMR analysis.

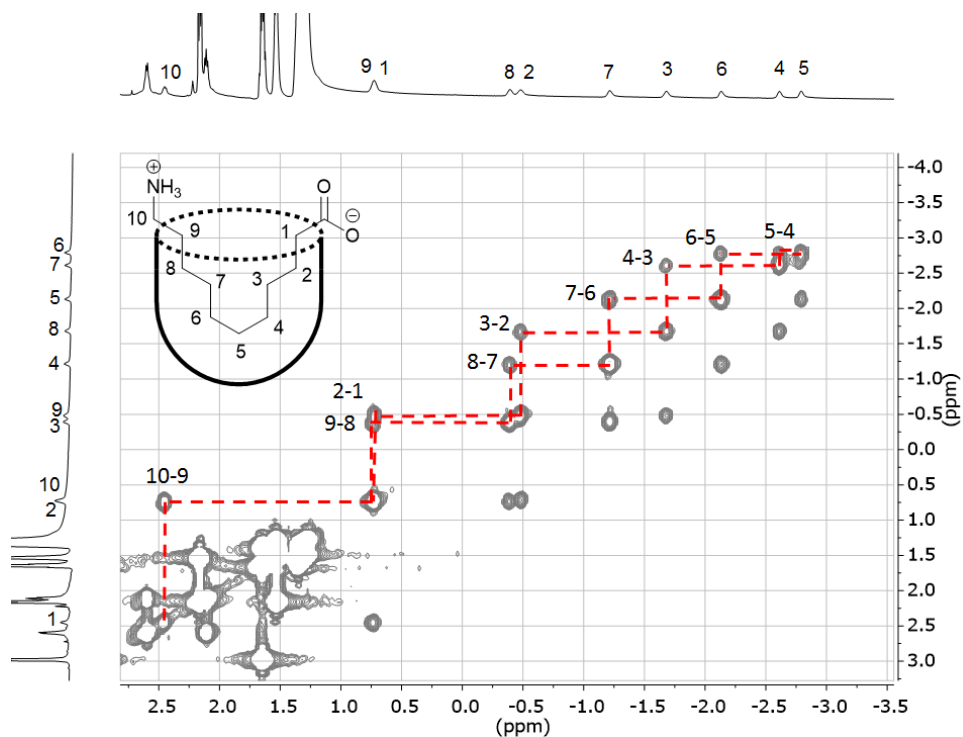

**Fig. S6** Partial  $^1\text{H}$ - $^1\text{H}$  COSY NMR spectra ( $\text{D}_2\text{O}$ ) of **1a** with 11-aminoundecanoic acid.

## Cartesian coordinates of calculated structures

The Capsule with encapsulated C17 was minimized at the Hartree-Fock methods (*ab initio*) and 6-31G\* basis set with Gaussian 09 software.<sup>2</sup> The propyl pyridinium “feet” were replaced with hydrogens to reduce computation time.

|   |            |             |             |
|---|------------|-------------|-------------|
| O | 1.29741400 | 7.14230800  | 0.22514900  |
| H | 1.70483500 | 7.90456200  | 0.61485800  |
| H | 0.89138300 | 6.65405900  | 0.94709900  |
| H | 1.19323700 | 4.26379100  | 3.27463900  |
| C | 8.77926000 | -2.58586100 | -0.56391300 |
| C | 8.30881300 | -3.24984800 | 0.55795100  |
| C | 7.21569200 | -4.08825500 | 0.38288500  |
| C | 6.60473300 | -4.20699900 | -0.85547500 |
| C | 7.07244500 | -3.48686000 | -1.94415800 |
| C | 8.19661100 | -2.67943200 | -1.81987700 |
| C | 8.34024400 | 1.87173200  | -2.60764100 |
| C | 8.83330800 | 0.57813800  | -2.49458900 |
| C | 8.25379300 | -0.51264500 | -3.13069000 |
| C | 7.14275900 | -0.27289200 | -3.92235900 |
| C | 6.65840000 | 1.00821800  | -4.10319600 |
| C | 7.24032800 | 2.06476600  | -3.43065300 |
| C | 6.63910500 | -1.01784300 | 4.15070300  |
| C | 7.23629400 | -2.07048500 | 3.48494800  |
| C | 8.33819100 | -1.87101300 | 2.66611400  |
| C | 8.82283600 | -0.57401500 | 2.55866200  |
| C | 8.22989200 | 0.51282100  | 3.18938700  |
| C | 7.11127900 | 0.26788300  | 3.96919400  |
| C | 7.04873600 | 3.48811200  | 1.98970600  |
| C | 8.16826400 | 2.67440100  | 1.87059600  |
| C | 8.75391800 | 2.57683700  | 0.61687700  |
| C | 8.29263400 | 3.24795500  | -0.50456400 |
| C | 7.20137500 | 4.08944000  | -0.33474800 |
| C | 6.58652300 | 4.21002000  | 0.90079600  |

|   |            |             |             |
|---|------------|-------------|-------------|
| C | 8.96922600 | -3.02829700 | 1.90858100  |
| C | 8.80512300 | -1.91826800 | -2.98311700 |
| C | 8.96188300 | 3.03241000  | -1.85039900 |
| C | 8.77255100 | 1.92088900  | 3.04073900  |
| O | 6.81674300 | -4.88979400 | 1.43077900  |
| O | 6.50313100 | -3.68474700 | -3.18517400 |
| O | 6.59552400 | -1.32251700 | -4.61611000 |
| O | 6.80716900 | 3.34676000  | -3.65706200 |
| O | 6.81350700 | -3.35599900 | 3.71001400  |
| O | 6.54022400 | 1.31538800  | 4.64875900  |
| O | 6.47099400 | 3.68253600  | 3.22652400  |
| O | 6.80382900 | 4.88821600  | -1.38430800 |
| C | 2.93029300 | 3.07832200  | 3.75147000  |
| C | 2.96964000 | 1.83658300  | 4.37492200  |
| C | 4.16160700 | 1.22106500  | 4.66275900  |
| C | 5.33903500 | 1.84008500  | 4.25610800  |
| C | 5.30326000 | 3.05051100  | 3.56944100  |
| C | 4.08877600 | 3.69589700  | 3.33713500  |
| C | 4.44794600 | -3.57700100 | 3.90053300  |
| C | 3.29884600 | -4.17057000 | 3.43883800  |
| C | 3.32972700 | -5.05710800 | 2.37231000  |
| C | 4.49130400 | -5.30632300 | 1.68138400  |
| C | 5.64332500 | -4.64410500 | 2.08800700  |
| C | 5.63026100 | -3.82199600 | 3.21178900  |
| C | 4.12316800 | -3.70616000 | -3.35962800 |
| C | 5.34125200 | -3.05701700 | -3.55824300 |
| C | 5.38836300 | -1.85091600 | -4.25155600 |
| C | 4.22060800 | -1.23654000 | -4.69146700 |
| C | 3.02317700 | -1.85274700 | -4.43002000 |
| C | 2.97339400 | -3.09333700 | -3.80605300 |
| C | 4.47423900 | 5.28810600  | -1.62968800 |
| C | 5.63029000 | 4.63287500  | -2.03857100 |
| C | 5.62084900 | 3.80741200  | -3.15906200 |
| C | 4.43842700 | 3.55557900  | -3.84650500 |

|   |             |             |             |
|---|-------------|-------------|-------------|
| C | 3.28703100  | 4.14562000  | -3.38637100 |
| C | 3.31371600  | 5.03323600  | -2.31972100 |
| N | 1.58917800  | 3.44910200  | 3.70439700  |
| N | 1.65756300  | 1.48694400  | 4.66757700  |
| N | 1.97957900  | -4.11514700 | 3.87908900  |
| N | 2.03409700  | -5.52779700 | 2.21075900  |
| N | 1.71649100  | -1.50445800 | -4.74931400 |
| N | 1.63258600  | -3.46710400 | -3.78899400 |
| N | 1.96984500  | 4.09111000  | -3.83117200 |
| N | 2.01838600  | 5.50670500  | -2.16577200 |
| C | 0.86084900  | -2.48079900 | -4.32804300 |
| C | 1.20294400  | -4.90338700 | 3.08511700  |
| C | 0.80990300  | 2.46493100  | 4.23651100  |
| C | 1.18943100  | 4.88538800  | -3.04549900 |
| H | 9.65014300  | -1.96273600 | -0.45578900 |
| H | 5.78381500  | -4.88482400 | -0.98327900 |
| H | 9.70562700  | 0.41352400  | -1.88563400 |
| H | 5.85506100  | 1.18577800  | -4.78682500 |
| H | 5.83128900  | -1.20014800 | 4.82791900  |
| H | 9.69734000  | -0.40188200 | 1.95497800  |
| H | 9.62262400  | 1.95045200  | 0.51120000  |
| H | 5.76817000  | 4.89110500  | 1.02600100  |
| H | 8.90899300  | -3.92844800 | 2.50140100  |
| H | 8.64489600  | -2.46509500 | -3.90000300 |
| H | 8.89827500  | 3.93211800  | -2.44345800 |
| H | 8.60181000  | 2.47060200  | 3.95404000  |
| O | -0.34982000 | -2.47060900 | -4.42598000 |
| O | -0.00866300 | -5.01567400 | 3.14494400  |
| O | -0.40229600 | 2.45796900  | 4.32165000  |
| O | -0.01955500 | 5.00886100  | -3.12045900 |
| H | 10.01964500 | -2.81167400 | 1.74995300  |
| H | 9.87618500  | -1.85680900 | -2.82624000 |
| H | 10.01290400 | 2.82250500  | -1.68692100 |
| H | 9.84516900  | 1.86605400  | 2.89232800  |



|   |             |             |             |
|---|-------------|-------------|-------------|
| H | 4.19738500  | 0.30594900  | 5.21918400  |
| H | 4.08140800  | 4.66033800  | 2.86700600  |
| H | 4.45000800  | -2.96481400 | 4.78018000  |
| H | 4.52620200  | -5.98781900 | 0.85366100  |
| H | 4.10595000  | -4.66814600 | -2.88487800 |
| H | 4.26949600  | -0.32505500 | -5.25274200 |
| H | 4.50775700  | 5.97469100  | -0.80603100 |
| H | 4.44274800  | 2.94142600  | -4.72485500 |
| H | 1.33579700  | 0.56155300  | 4.87668300  |
| H | 1.57546500  | -3.35431100 | 4.39135000  |
| H | 1.71695700  | -6.09833300 | 1.45072300  |
| H | 1.39653100  | -0.58062300 | -4.96477100 |
| H | 1.22720600  | -4.26435200 | -3.33680300 |
| H | 1.56852900  | 3.33623600  | -4.35460400 |
| H | 1.70078100  | 6.09056500  | -1.41655900 |
| O | -1.23075200 | 6.99645100  | -1.31428800 |
| H | -0.98076800 | 6.34837700  | -1.97078500 |
| H | -0.41879000 | 7.42004700  | -1.05876800 |
| H | -1.28502800 | -0.45647900 | -4.87235000 |
| H | -1.11484900 | 3.45606100  | -3.85634500 |
| C | -8.70710800 | -2.44996000 | 1.04870400  |
| C | -8.25727800 | -3.33098100 | 0.07809900  |
| C | -7.16435300 | -4.12507600 | 0.39625600  |
| C | -6.53957400 | -4.00546100 | 1.62765200  |
| C | -6.98433900 | -3.07397300 | 2.55388300  |
| C | -8.10540400 | -2.29676200 | 2.28886800  |
| C | -8.30298900 | 2.33646300  | 2.26444100  |
| C | -8.76583900 | 1.03222500  | 2.37282300  |
| C | -8.16679900 | 0.08079500  | 3.18848200  |
| C | -7.06312200 | 0.47714100  | 3.92547300  |
| C | -6.60588700 | 1.78148600  | 3.88274700  |
| C | -7.21238700 | 2.69538400  | 3.04298200  |
| C | -6.60349400 | -1.83670600 | -3.86512600 |
| C | -7.21262700 | -2.75420700 | -3.02896300 |

|   |             |             |             |
|---|-------------|-------------|-------------|
| C | -8.29487100 | -2.39175400 | -2.24062300 |
| C | -8.75032600 | -1.08354400 | -2.34029500 |
| C | -8.15025800 | -0.13107700 | -3.15240600 |
| C | -7.05020400 | -0.52846900 | -3.89447500 |
| C | -6.97379800 | 3.03420100  | -2.51940600 |
| C | -8.08892200 | 2.24949300  | -2.25298000 |
| C | -8.69198900 | 2.40106000  | -1.01409600 |
| C | -8.25242100 | 3.29010600  | -0.04619100 |
| C | -7.16601800 | 4.09398800  | -0.36494500 |
| C | -6.53620200 | 3.97187700  | -1.59480100 |
| C | -8.93243500 | -3.37932100 | -1.28024100 |
| C | -8.70240000 | -1.33405900 | 3.29860000  |
| C | -8.93614800 | 3.33030100  | 1.30789600  |
| C | -8.68410900 | 1.28444800  | -3.26117100 |
| O | -6.78582200 | -5.11239100 | -0.48789700 |
| O | -6.38966000 | -3.01267700 | 3.79656500  |
| O | -6.49247400 | -0.42689500 | 4.78705100  |
| O | -6.82353700 | 4.01155600  | 3.05031700  |
| O | -6.82311000 | -4.07217100 | -3.04556700 |
| O | -6.47921600 | 0.37947000  | -4.75152400 |
| O | -6.38417700 | 2.97554200  | -3.76514600 |
| O | -6.80344100 | 5.09542500  | 0.51105000  |
| C | -2.85485400 | 2.22400100  | -4.14255600 |
| C | -2.90851400 | 0.89785000  | -4.55323800 |
| C | -4.10886800 | 0.26161500  | -4.74031000 |
| C | -5.27706000 | 0.95896100  | -4.45149900 |
| C | -5.22796200 | 2.26920300  | -3.98059000 |
| C | -4.00371100 | 2.92288100  | -3.84916400 |
| C | -4.47926000 | -4.42571000 | -3.25726600 |
| C | -3.31793500 | -4.90658800 | -2.70130500 |
| C | -3.31736900 | -5.49095500 | -1.44385100 |
| C | -4.46270300 | -5.56984300 | -0.68658300 |
| C | -5.62667700 | -5.01976400 | -1.20875800 |
| C | -5.63897400 | -4.47259000 | -2.49093800 |

|   |             |             |             |
|---|-------------|-------------|-------------|
| C | -4.00552700 | -2.94476700 | 3.84489900  |
| C | -5.23323600 | -2.30290700 | 4.00110200  |
| C | -5.28718800 | -0.99762100 | 4.48303800  |
| C | -4.12230300 | -0.29426200 | 4.76772900  |
| C | -2.91953000 | -0.91764900 | 4.55648700  |
| C | -2.85866900 | -2.23771000 | 4.12749200  |
| C | -4.50502300 | 5.64539400  | 0.74951100  |
| C | -5.64692100 | 5.02309200  | 1.23968100  |
| C | -5.64395100 | 4.43000500  | 2.50119800  |
| C | -4.48004000 | 4.37613600  | 3.26071000  |
| C | -3.33470700 | 4.91455700  | 2.72510800  |
| C | -3.35870900 | 5.57645400  | 1.50662200  |
| N | -1.51026600 | 2.57946800  | -4.14378400 |
| N | -1.59920100 | 0.48961800  | -4.77531600 |
| N | -2.00404400 | -4.95917200 | -3.16464200 |
| N | -2.01248900 | -5.88640700 | -1.18647200 |
| N | -1.61197000 | -0.50079200 | 4.77099000  |
| N | -1.51084100 | -2.58060400 | 4.10941600  |
| N | -2.02268500 | 4.98344600  | 3.19170100  |
| N | -2.07200500 | 6.04696900  | 1.28124900  |
| C | -0.74978600 | -1.51732300 | 4.48558800  |
| C | -1.20723600 | -5.51075300 | -2.20608700 |
| C | -0.74300800 | 1.51627400  | -4.51060800 |
| C | -1.24623600 | 5.60492600  | 2.25948100  |
| H | -9.57854600 | -1.85703400 | 0.83134900  |
| H | -5.72390700 | -4.65407200 | 1.87977000  |
| H | -9.63131200 | 0.74607100  | 1.80032000  |
| H | -5.80700600 | 2.09017500  | 4.52408200  |
| H | -5.80835400 | -2.14559000 | -4.51141900 |
| H | -9.61150300 | -0.79613800 | -1.76202100 |
| H | -9.55875500 | 1.80182400  | -0.79556600 |
| H | -5.72519200 | 4.62676800  | -1.84716200 |
| H | -8.87959600 | -4.37737600 | -1.68733300 |
| H | -8.52856700 | -1.70489500 | 4.29744400  |

|   |             |             |             |
|---|-------------|-------------|-------------|
| H | -8.88619000 | 4.32539200  | 1.72244900  |
| H | -8.51096300 | 1.65455000  | -4.26035800 |
| O | 0.46415500  | -1.47628300 | 4.56790300  |
| O | 0.00848600  | -5.63411900 | -2.26575600 |
| O | 0.47072200  | 1.48410600  | -4.59777200 |
| O | -0.03052700 | 5.72724700  | 2.30485800  |
| H | -9.98044900 | -3.12902100 | -1.15995900 |
| H | -9.77568100 | -1.30886200 | 3.14675300  |
| H | -9.98321800 | 3.08034600  | 1.17918500  |
| H | -9.75735800 | 1.25916000  | -3.10918700 |
| H | -4.16001800 | -0.73377400 | -5.13373000 |
| H | -3.97947300 | 3.95276400  | -3.54916600 |
| H | -4.50998400 | -4.03295700 | -4.25460800 |
| H | -4.47172100 | -6.04032500 | 0.27753300  |
| H | -3.97591000 | -3.97174400 | 3.53573400  |
| H | -4.17656300 | 0.69562800  | 5.17430400  |
| H | -4.53283900 | 6.15780400  | -0.19296200 |
| H | -4.49594200 | 3.94182800  | 4.24085500  |
| H | -1.61244600 | -4.36726200 | -3.86996400 |
| H | -1.68454800 | -6.26842300 | -0.31282400 |
| H | -1.30625600 | 0.44821400  | 4.86271600  |
| H | -1.11002300 | -3.45347400 | 3.81870800  |
| H | -1.61239100 | 4.34706700  | 3.84642500  |
| H | -1.74454500 | 6.41456500  | 0.40221000  |
| C | 5.71236200  | -0.38805100 | 0.25762400  |
| C | 4.73039700  | 0.52392400  | -0.46554100 |
| C | 3.43276200  | 0.72333800  | 0.31152100  |
| C | 2.45036300  | 1.63933700  | -0.40932600 |
| C | 1.07773100  | 1.72278500  | 0.25397500  |
| C | 0.20201700  | 2.78400500  | -0.40501200 |
| C | -1.22398700 | 2.89432500  | 0.12900900  |
| C | -2.13292400 | 1.71689700  | -0.21133300 |
| H | 6.64080700  | -0.48080400 | -0.29058900 |
| H | 5.94648300  | 0.00039200  | 1.24159000  |

|   |             |             |             |
|---|-------------|-------------|-------------|
| H | 5.30008000  | -1.38406600 | 0.38494700  |
| H | 5.19595700  | 1.48991600  | -0.64114500 |
| H | 4.50472800  | 0.11179000  | -1.44645800 |
| H | 2.97000500  | -0.24191600 | 0.49290700  |
| H | 3.66048000  | 1.13857600  | 1.29042900  |
| H | 2.88259100  | 2.63569800  | -0.47102800 |
| H | 2.32302800  | 1.30083300  | -1.43649800 |
| H | 0.59838900  | 0.75019300  | 0.20574200  |
| H | 1.19225200  | 1.95570500  | 1.30939100  |
| H | 0.68869000  | 3.74740600  | -0.27833900 |
| H | 0.16409100  | 2.59790300  | -1.47515300 |
| H | -1.19703400 | 3.02197100  | 1.20839300  |
| H | -1.66446700 | 3.79653800  | -0.28429400 |
| H | -2.06973200 | 1.51849000  | -1.27844700 |
| C | -3.59025200 | 1.98829500  | 0.15945600  |
| H | -3.66285000 | 2.17793100  | 1.22775000  |
| H | -3.89923300 | 2.90430500  | -0.33313600 |
| C | -4.57112000 | 0.87944400  | -0.22152600 |
| C | -4.43191000 | -0.42108500 | 0.59644400  |
| C | -4.17058400 | -1.66178100 | -0.25995700 |
| C | -2.78388700 | -1.72688000 | -0.90439600 |
| C | -1.66995200 | -2.08161700 | 0.07931900  |
| C | -0.29797600 | -2.17846600 | -0.58120100 |
| C | 0.81233800  | -2.51597800 | 0.41009700  |
| C | 2.13917800  | -2.83406200 | -0.27311700 |
| H | -5.57868100 | 1.26329400  | -0.10299000 |
| H | -3.64971700 | -0.31471900 | 1.34215300  |
| H | -5.34631200 | -0.58517800 | 1.15565300  |
| H | -4.30920000 | -2.54976600 | 0.34762200  |
| H | -4.92948000 | -1.70362100 | -1.03551700 |
| H | -2.79594300 | -2.47350400 | -1.68989600 |
| H | -2.55253200 | -0.78883900 | -1.39741000 |
| H | -1.62890200 | -1.35501600 | 0.88580800  |
| H | -1.90381400 | -3.03525000 | 0.54998300  |

|   |             |             |             |
|---|-------------|-------------|-------------|
| H | -0.32723600 | -2.93597200 | -1.35812800 |
| H | -0.06507200 | -1.24305900 | -1.08606100 |
| H | 0.49858800  | -3.36838000 | 1.00287400  |
| H | 2.94854100  | -2.92330300 | 0.44134300  |
| H | 2.07051400  | -3.77089900 | -0.81689700 |
| H | 2.41242000  | -2.06090400 | -0.98262000 |
| H | -4.46241600 | 0.66465700  | -1.28107500 |
| H | -1.77920800 | 0.82465500  | 0.29077200  |
| H | 0.93976400  | -1.69261700 | 1.10851100  |
| O | 1.30433800  | -7.11321200 | -0.20560700 |
| H | 1.71872900  | -7.86249000 | -0.61271900 |
| H | 0.91406000  | -6.60004300 | -0.91863600 |
| O | -1.22758100 | -6.97277500 | 1.35324900  |
| H | -0.95335900 | -6.34490000 | 2.02000000  |
| H | -0.43339400 | -7.42423600 | 1.09015900  |

## References

1. G. R. Fulmer, A. J. M. Miller, N. H. Sherden, H. E. Gottlieb, A. Nudelman, B. M. Stoltz, J. E. Bercaw, and K. I. Goldberg, *Organometallics*, 2010, **29**, 2176–2179.
2. M. J. Frisch, G. W. Trucks, H. B. Schlegel, G. E. Scuseria, M. A. Robb, J. R. Cheeseman, G. Scalmani, V. Barone, B. Mennucci, G. A. Petersson, H. Nakatsuji, M. Caricato, X. Li, H. P. Hratchian, A. F. Izmaylov, J. Bloino, G. Zheng, J. L. Sonnenberg, M. Hada, M. Ehara, K. Toyota, R. Fukuda, J. Hasegawa, M. Ishida, T. Nakajima, Y. Honda, O. Kitao, H. Nakai, T. Vreven, J. A. Montgomery, Jr., J. E. Peralta, F. Ogliaro, M. Bearpark, J. J. Heyd, E. Brothers, N. Kudin, V. N. Staroverov, T. Keith, R. Kobayashi, J. Normand, K. Raghavachari, A. Rendell, J. C. Burant, S. S. Iyengar, J. Tomasi, M. Cossi, N. Rega, J. M. Millam, M. Klene, J. E. Knox, J. B. Cross, V. Bakken, C. Adamo, J. Jaramillo, R. Gomperts, R. E. Stratmann, O. Yazyev, A. J. Austin, R. Cammi, C. Pomelli, J. W. Ochterski, R. L. Martin, K. Morokuma, V. G. Zakrzewski, G. A. Voth, P. Salvador, J. J. Dannenberg, S. Dapprich, A. D. Daniels, O. Farkas, J. B. Foresman, J. V. Ortiz, J. Cioslowski, and D. J. Fox, *Gaussian 09, Revision C.01*, Gaussian, Inc., Wallingford CT, 2010.
